# Supplementary material for: Neuronal RBM5 modulates cell signaling responses to traumatic and hypoxic-ischemic injury in a sex-dependent manner
Source: PubMed Central journal article supplement (PMC10582027; doi:10.1038/s41420-023-01677-7), 2023-10-17
Supplement: 41420_2023_1677_MOESM10_ESM.pdf [file 41420_2023_1677_MOESM10_ESM.pdf]

## Supplementary Figure Legends

**Fig. S1: Total Protein Stains and Additional Blot for SBDP Following Mechanical Stretch Injury in Mixed-Sex WT Neurons.** (A) Total protein stain of the PVDF membrane for densitometry as a loading control for sample set 1-3 on SBDPs (i.e., Fig. 1C). (B) Western shows SBDPs (n=3/group) for sample set 4-6. (C) Total protein stain for densitometry as a loading control for sample set 4-6 on SBDPs (Fig. S1B).

**Fig. S2: Additional Western Blots for Signaling Targets in Fig. 2.** (A-F) Western blots show target analysis results for sample set B on pERK, ERK total, pAKT, AKT Total, PERK, and GFAP (n=2/group). Results of sample set A and set B were combined to generate box plots in Fig. 2.

**Fig. S3: Total Protein Stains for Western blots on Cell Signaling Targets in Fig. 2 Studies.** (A-I) Total protein stains of PVDF membranes used for densitometry as a loading control in Fig. 2 and Fig. S2.

**Fig. S4: Total Protein Stains and Additional SBDP Blot in Sex-Separated WT Neurons Subjected to Mechanical Stretch Injury.** (A) Total protein stain of the PVDF membrane for densitometry as a loading control for sample set 1-4 on SBDPs (i.e., Fig. 3D). (B) Western shows SBDPs (n=4/group) for sample set 5-8. (C) Total protein stain for densitometry as a loading control for sample set 5-8 on SBDPs (Fig. S4B).

**Fig. S5: Additional Western Blots for Signaling Targets in Fig. 4 and Fig. 5 on the Effect of RBM5 KO in Mechanical Stretch and OGD Injuries.** (A) Western blots show the results of RBM5, SBDP, caspase-3, pAKt, AKT total, pCREB, and CREB total for sample set 5-8 (n=4/group) in the stretch injury model. Data were combined with results of sample set 1-4 in to generate graphs in Fig. 4. (B) Western blots show the results of RBM5, SBDP, caspase-3, pAKt,

AKT total, pCREB, and CREB total for sample set 5-8 (n=4/group) in the OGD model. Data were combined with results of sample set 1-4 to generate graphs in Fig. 5. The red asterisk indicates a single sample for caspase-3 in the stretch-injury group for which analysis was not possible due to the lack of sample availability.

**Fig. S6: Total Protein Stains for Cell Signaling Targets Measured in Fig. 4 and Fig. S5A in Stretch-Injury. (A-F)** Total protein stain of PVDF membranes for densitometry as a protein loading control. Membranes correspond with cell signaling targets shown in Fig. 4D and in Fig. S5A.

**Fig. S7: Total Protein Stains for Cell Signaling Targets Measured in Fig. 5 and Fig. S5B in OGD. (A-F)** Total protein stain of PVDF membranes for densitometry as a protein loading control. Membranes correspond with cell signaling targets shown in Fig. 5E and in Fig. S5B.

**Fig. S8: ER $\alpha$  Protein Levels in Sex-Separated EV-Control Versus RBM5 KO Neurons in the OGD Model.** EV-control or CRE (RBM5 KO) neurons were pre-treated 3d with 1 $\mu$ M 17E or vehicle, injured with a 90min OGD, and returned to the incubator for an additional 24h with 1 $\mu$ M 17E or vehicle. **(A-B)** Western Blots for ER $\alpha$  and the corresponding total protein stains of PVDF membranes in male neurons. Panel A shows sample set 1-3, and panel B shows sample set 4-6. Total protein stain was collected after protein transfer and prior to incubation with a primary antibody. **(C-D)** Western Blots for ER $\alpha$  and the corresponding total protein stains of PVDF membranes in female neurons. Panel C shows sample set 1-3, and panel D shows sample set 4-6.

**Fig. S9: GPR30 Protein Levels in Sex-Separated EV-Control Versus RBM5 KO Neurons and in the OGD Model. (A)** Western blot for GPR30 and the corresponding total protein stain in

uninjured male and female neurons of the control (EV) and KO (CRE) genotype. Sample set A (1-3) and set B (4-6) were run together on the same blot. No effect of KO was seen. **(B and C)** Western Blots for GPR30 and the corresponding total protein stains of PVDF membranes in male neurons in EV vs. KO, vehicle vs. 17E, uninjured and OGD-injured neurons. Panel B shows sample set 1-3, and panel C shows sample set 4-6. No effect KO or 17E was seen, but there was a robust downregulation of GPR30 at 24h post-injury.

**Fig. S10: Total Protein Stains for Sample Set 1-3 on SBDP Blots in Fig. 6. (A)** Total Protein stain of PVDF membrane corresponding to sample set 1-3 Western Blot on SBDPs in male neurons (Fig. 6D). **(B)** Total Protein stain of PVDF membrane corresponding to sample set 1-3 Western Blot on SBDPs in female neurons (Fig. 6E).

**Fig. S11: Additional Blots on SBDP for Sample Set 4-6 in Support of Fig. 6 Studies. (A)** Western blot on SBDPs in sample set 4-6 and the corresponding total protein stain of PVDF membrane for densitometry as a loading control in male neurons. **(B)** Western blot on SBDPs in sample set 4-6 and the corresponding total protein stain of PVDF membrane for densitometry as a loading control in female neurons.

**Fig. S12: Volcano Plot on Differentially Expressed Genes Comparing Male vs. Female Uninjured EV-Control Neurons. (A)** Volcano plot shows the fold-change and p-value of the proteins identified in TMT analysis comparing uninjured EV male neurons versus uninjured EV female neurons. **(B)** Heat map of the 4 DE proteins.

**Fig. S13: Culture Purity (Sex Dichotomization) and Insult Severity in Cultures for TMT Analysis. (A)** All 3 independent floxed cortical neuron cultures for TMT Analysis were confirmed by SRY genotyping of embryos to be 100% male or 100% female. **(B)** Box plots show 24h post-

injury raw LDH values (OD450). There were no differences in insult severity comparing male vs. female EV injured neurons or male vs. female KO injured neurons.

**Fig. S14: Uncropped Blots from Fig. 2.** Images show the complete set of uncropped western blots to support Fig 2 studies.

**Fig. S15: Uncropped Blots from Fig. 4 and Fig. 5.** Images show the complete set of uncropped western blots used to support Fig. 4 and Fig. 5 studies. Some blots were physically cut in half after transfer to the PVDF membrane to permit the analysis of multiple targets at one time. This was necessary to conserve sample, which can only be obtained in limited quantities from 6-well plates.

**Fig. S16: Uncropped Blots from Fig. 6.** Images show the complete set of uncropped western blots to support Fig 6 studies.

**Fig. S17: Validation of Lentivirus Dose (Multiplicity of Infection) in Floxed Neurons for KO Studies.** **(Top)** Western blot shows RBM5 expression DIV6 cortical neurons in EV transduced vs. CRE transduced floxed neurons at 30, 60, and 100 MOI (n=3/group). **(Middle)** Western blot shows CRE Recombinase expression in EV transduced vs. CRE transduced floxed neurons at 30, 60, and 100 MOI (n=3/group). **(Bottom)** Representative total protein stain. 100 MOI was selected as the optimal dose due to maximal inhibition of RBM5 expression and confirmation of CRE expression. RBM5 expression was not inhibited by the EV control vector.

Supplementary Figures

Fig. S1

**A**

Total Protein Stain to SBDPs for Samples 1-3 (Fig. 1C)

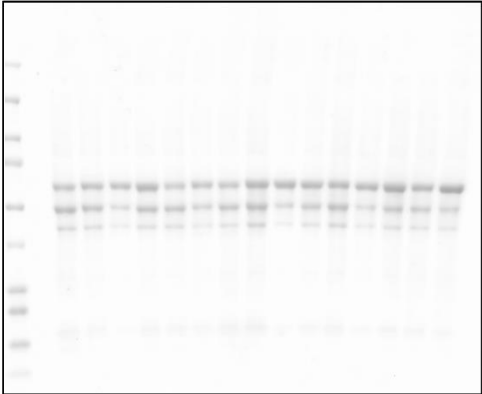

**B**

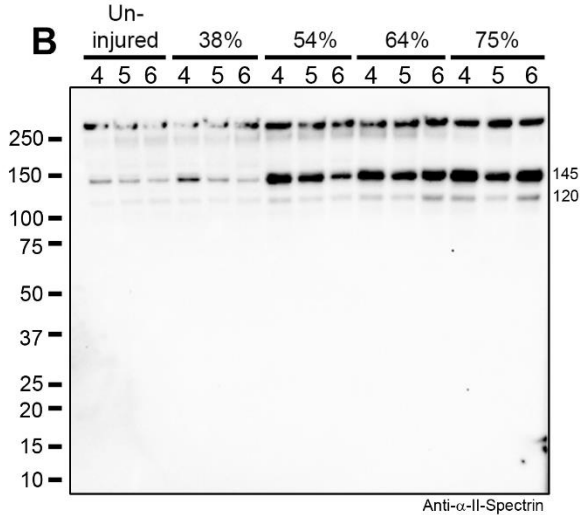

**C**

Total Protein Stain to SBDPs for Samples 4-6

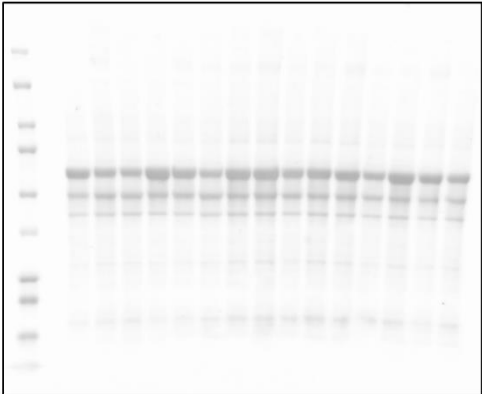

**Fig. S2**

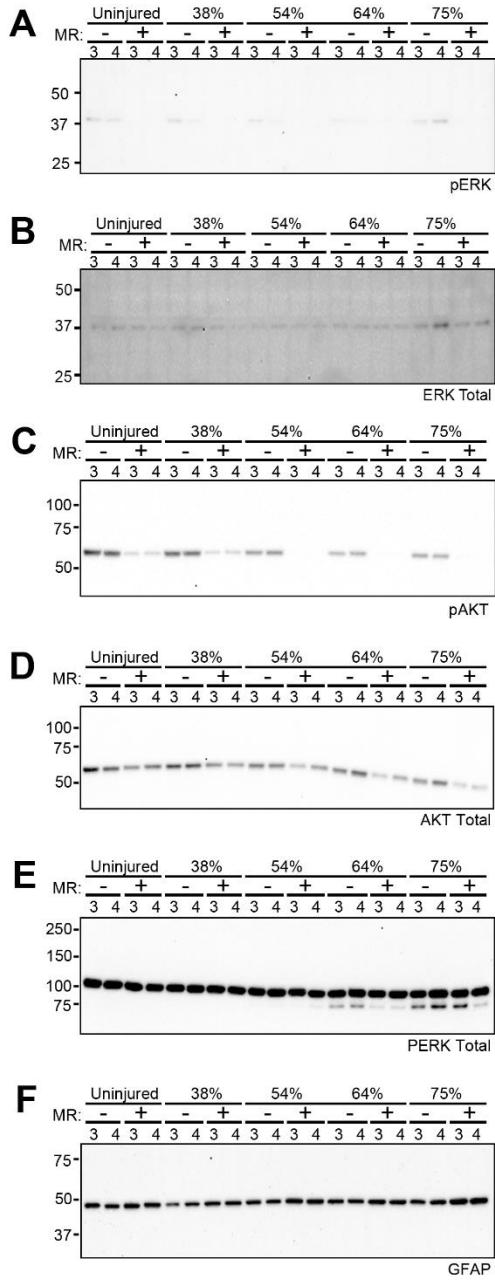

**Fig. S3**

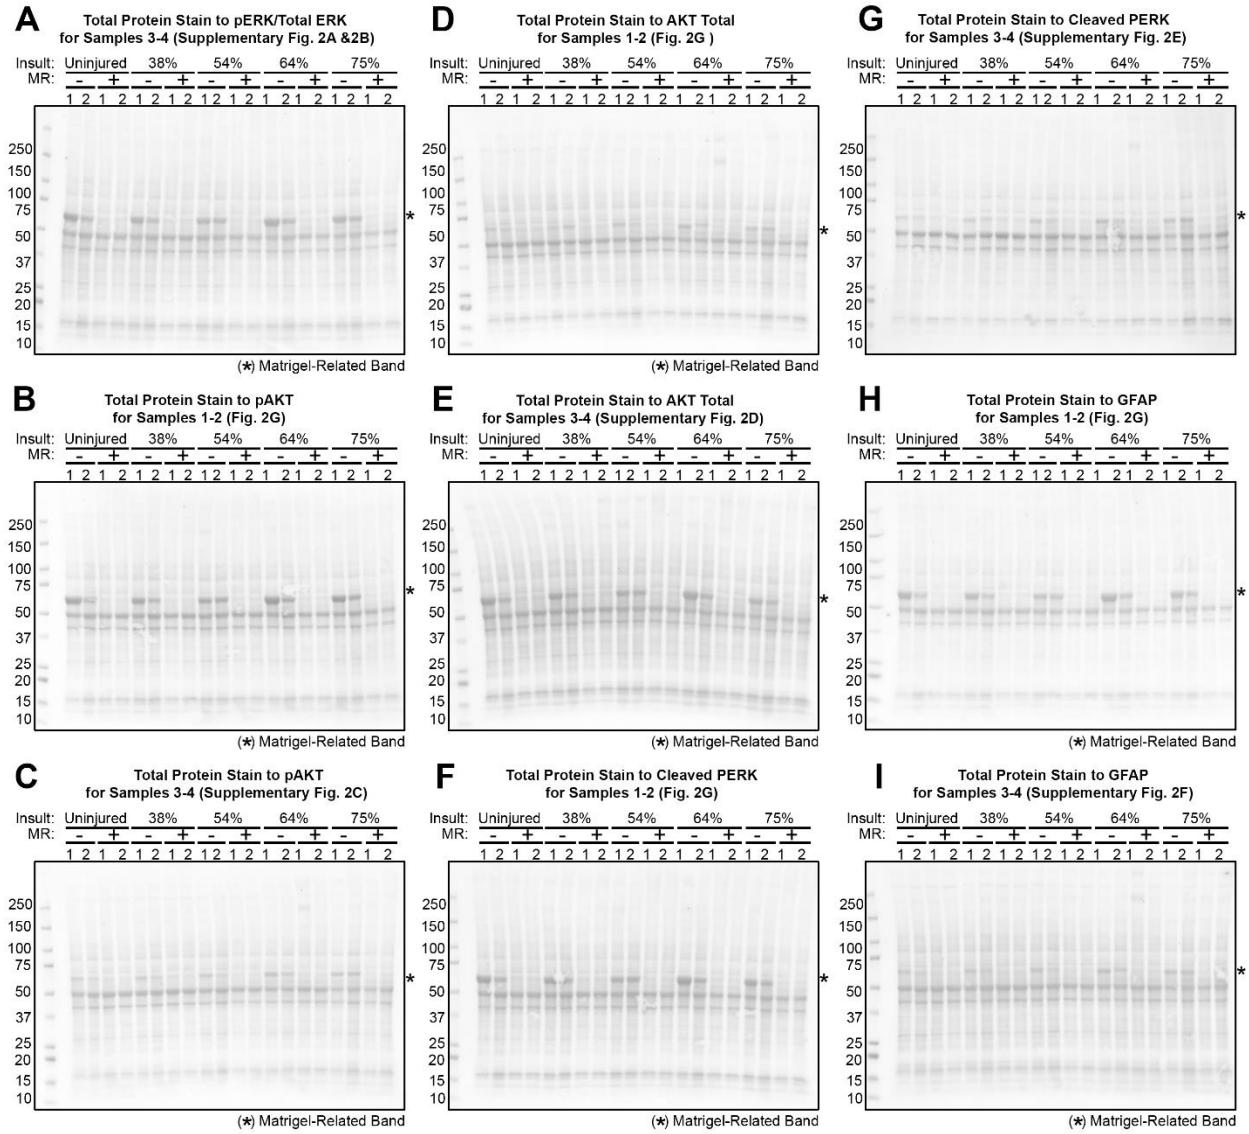

**Fig. S4**

**A**

Total Protein Stain to SBDPs for Samples 1-4 (Fig. 3D)

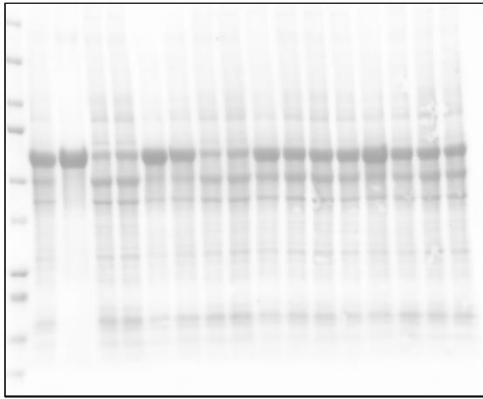

**B**

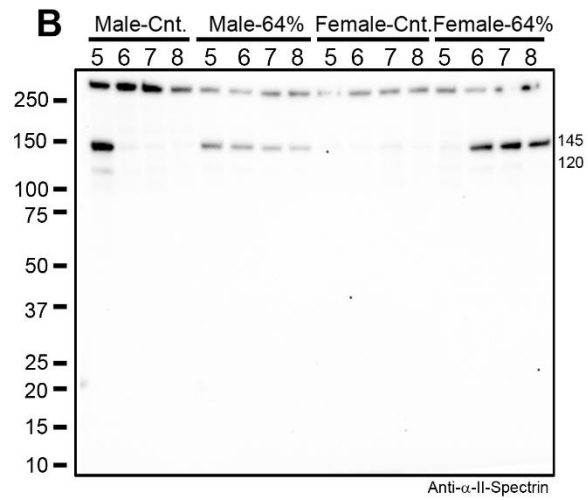

**C**

Total Protein Stain to SBDPs for Samples 5-8

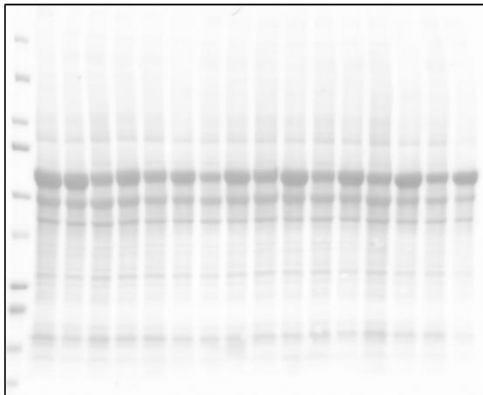



**Fig. S5**

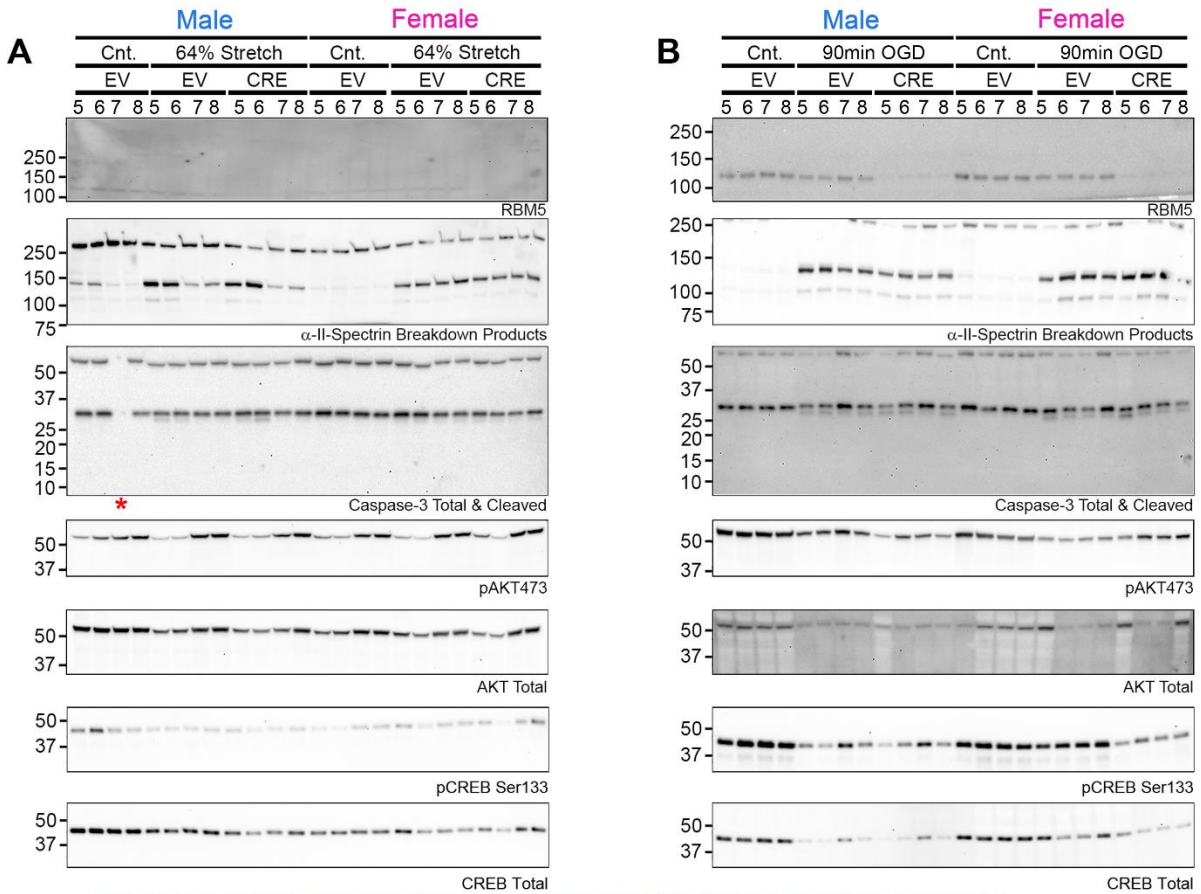

\* = Empty Lane for Caspase-3-Total Sample **Male-Cnt.-EV-#7** (Due to Sample Unavailability)

**Fig. S6**

**A**

TPS to: RBM5 Fig. 4D  
TPS to: pAKT/Total AKT Supp. Fig. 5A

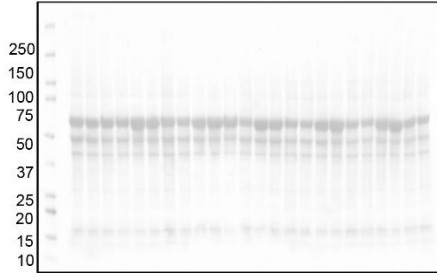

**D**

TPS to: SBDP Fig. 4D  
TPS to: Caspase-3 Fig. 4D

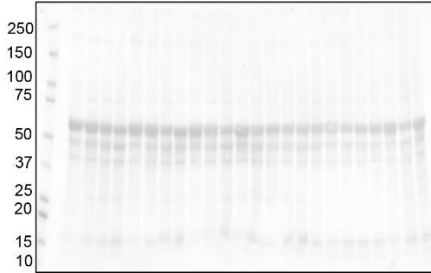

**B**

TPS to: RBM5 Supp. Fig. 5A  
TPS to: pCREB/CREB Total Fig. 4D

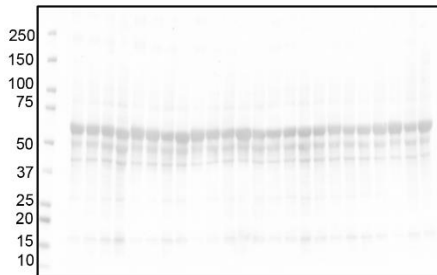

**E**

TPS to: SBDP Supp. Fig. 5A  
TPS to: pCREB/CREB Total Supp. Fig. 5A

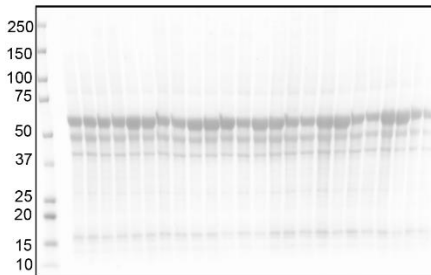

**C**

TPS to: pAKT/Total AKT Fig. 4D

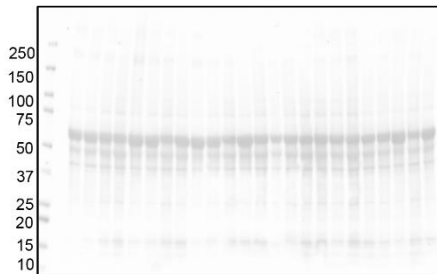

**F**

TPS to: Caspase-3 Supp. Fig. 5A

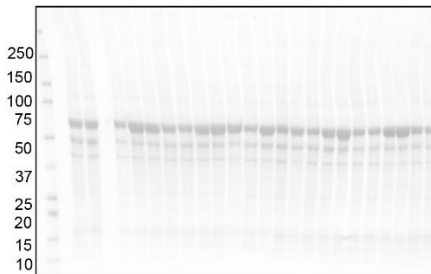

**Fig. S7**

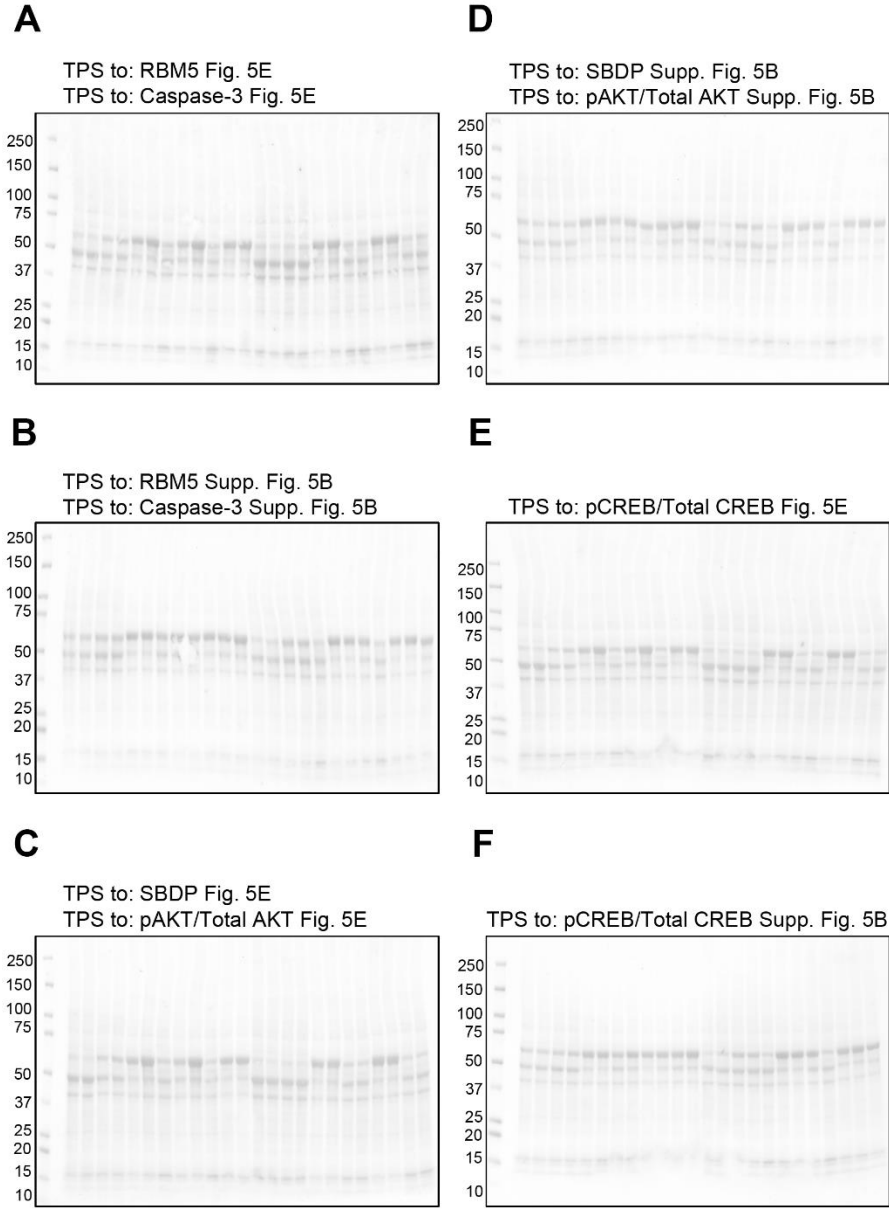

**Fig. S8**

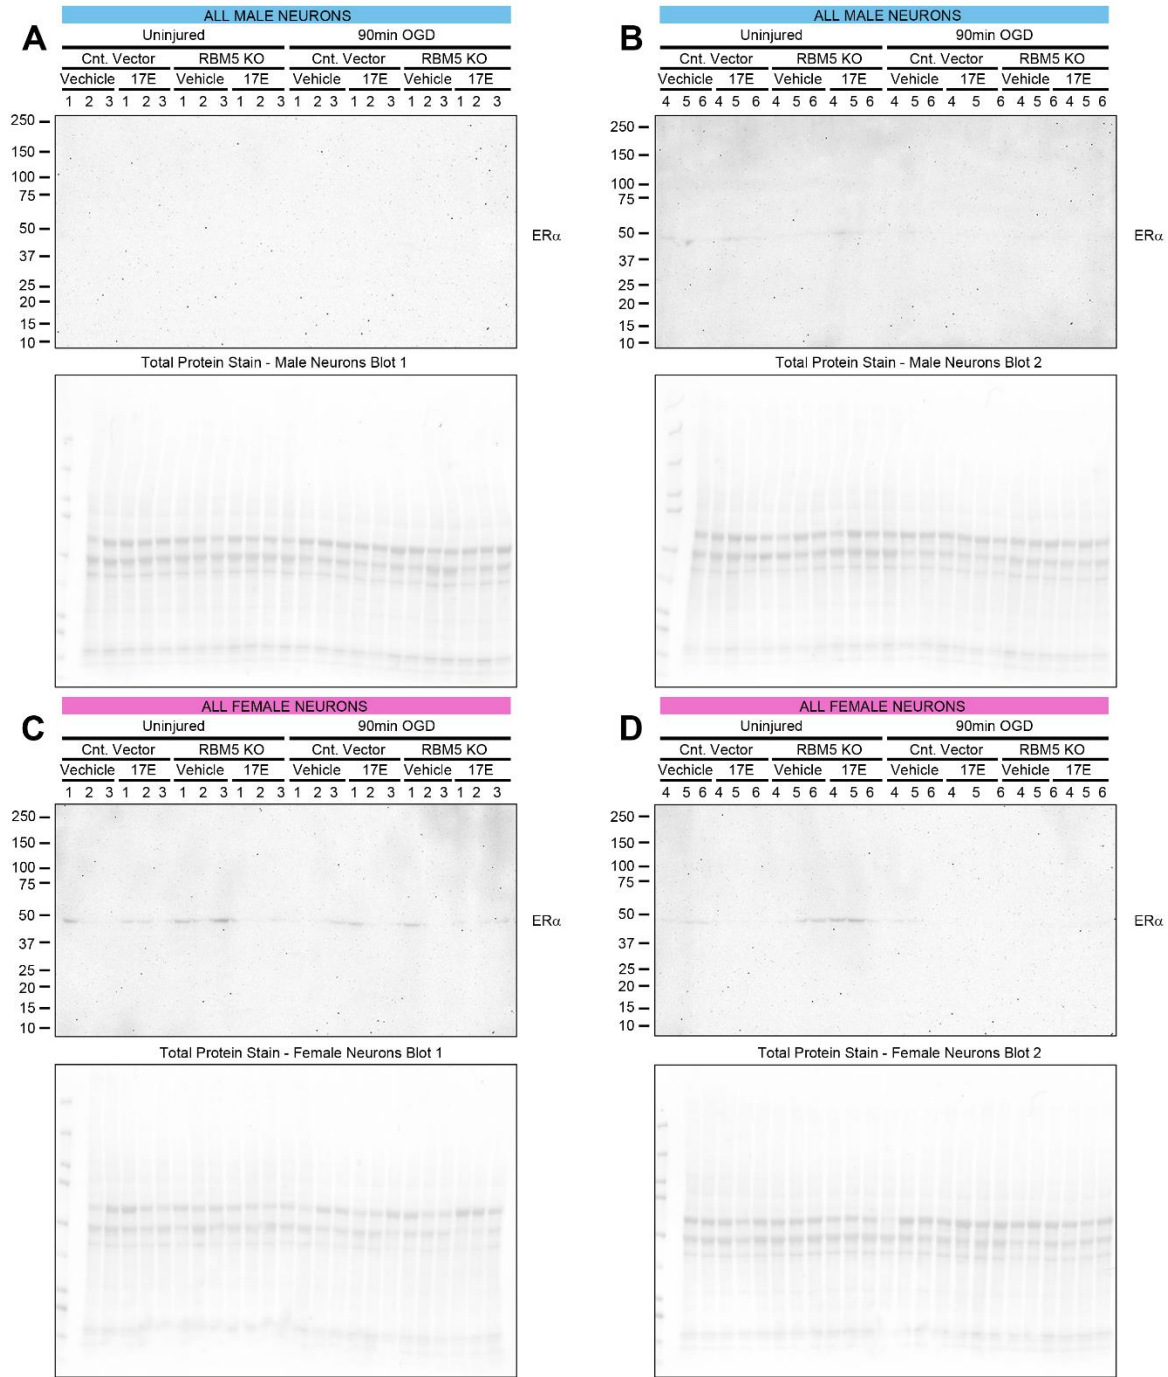

**Fig. S9**

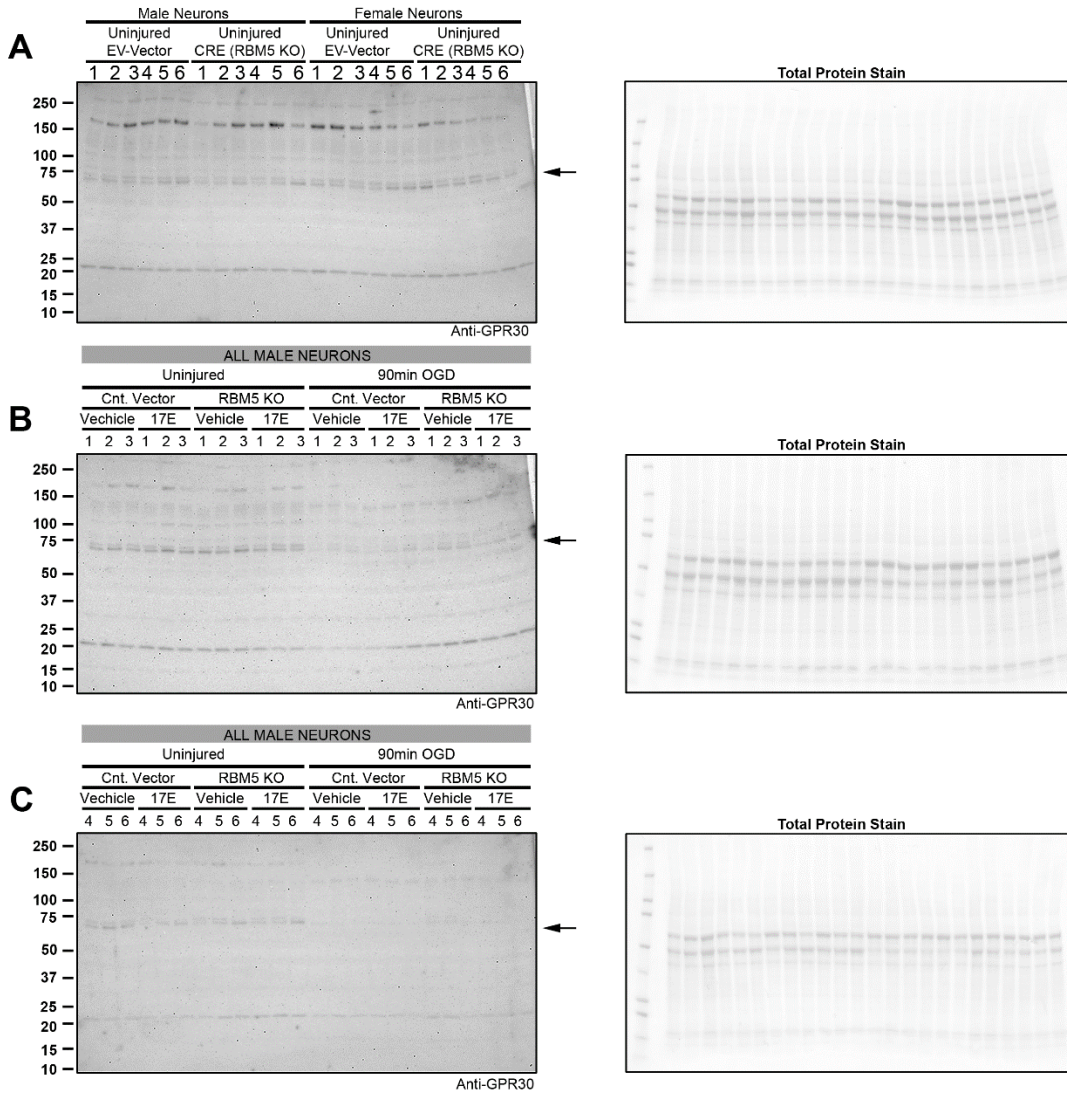

Fig. S10

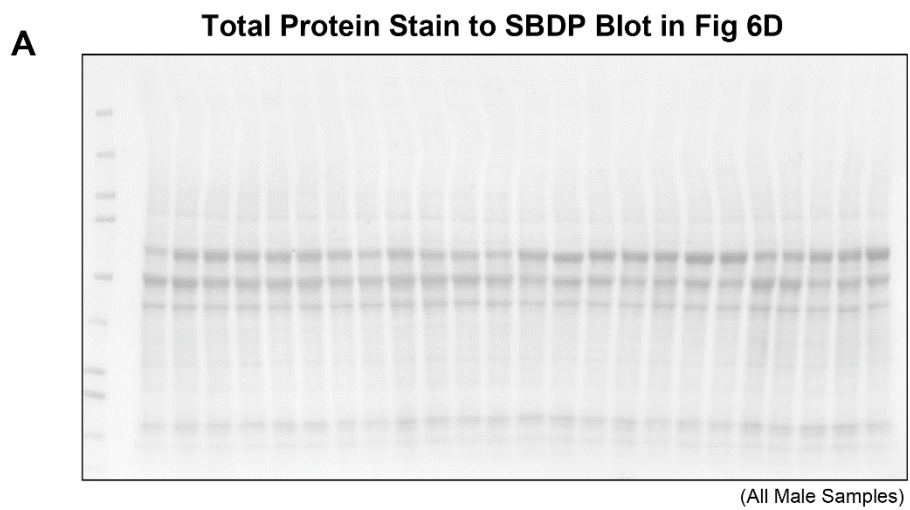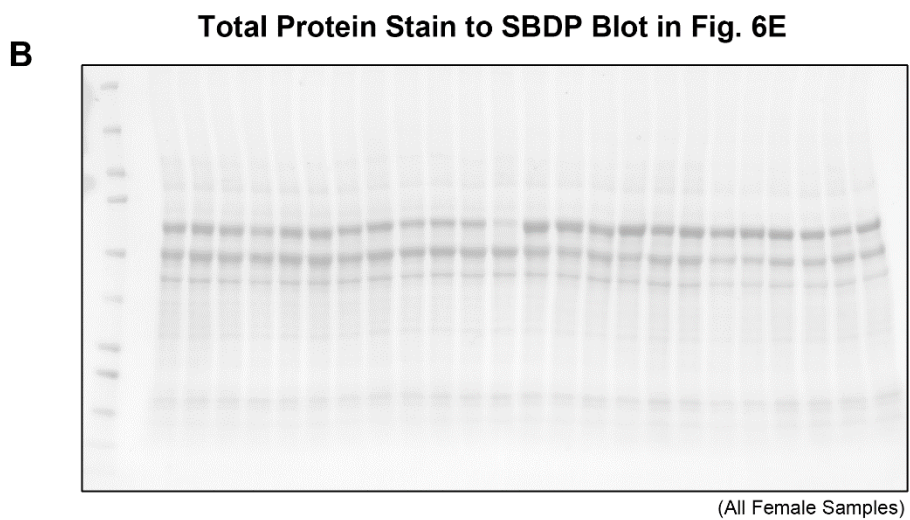

Fig. S11

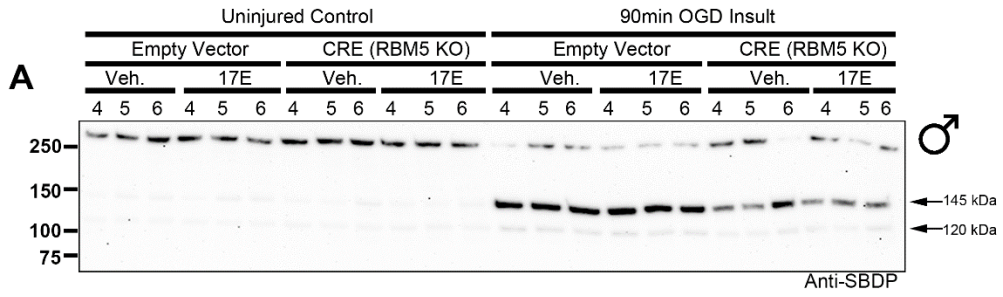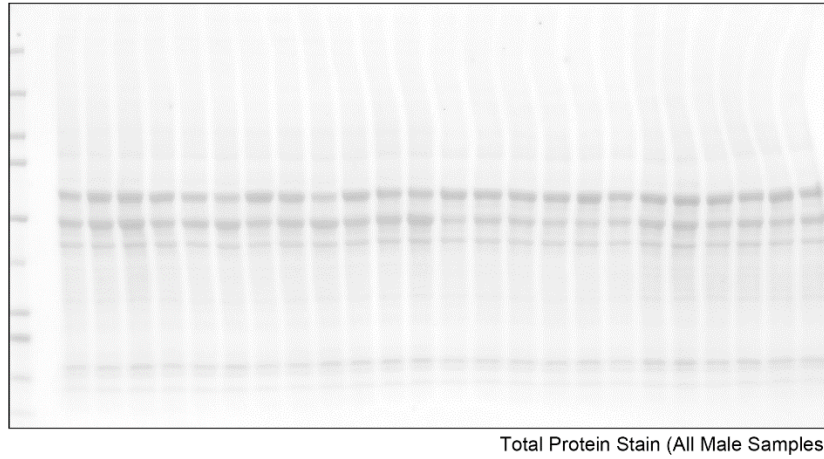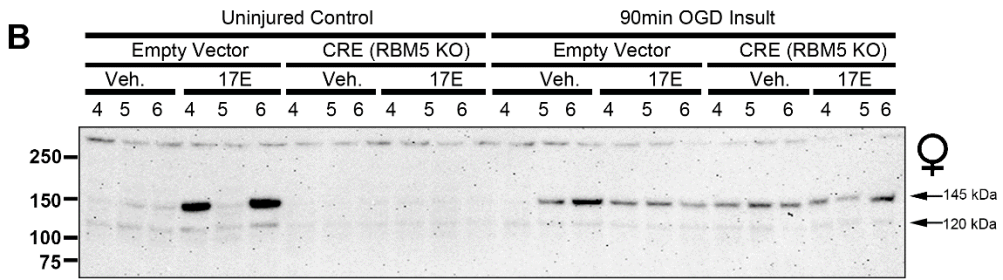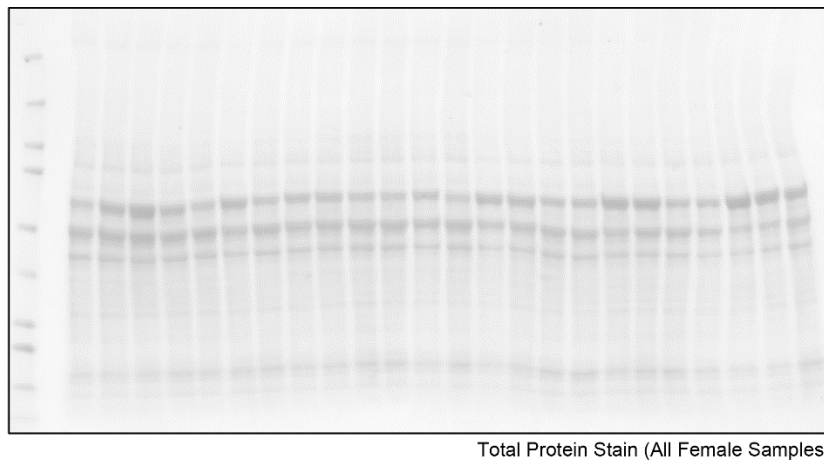

Fig. S12

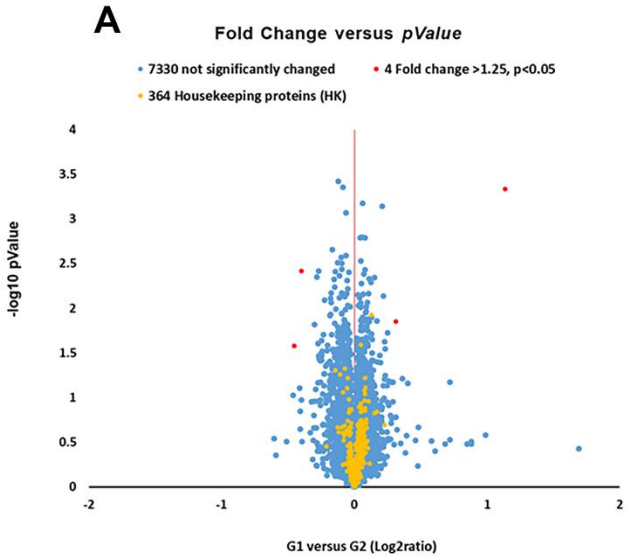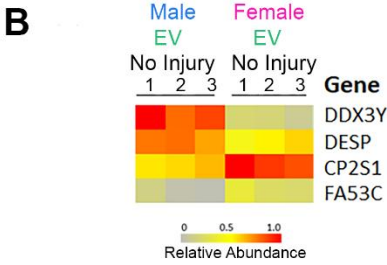



Fig. S13

## TMT Analysis Neuron Cultures

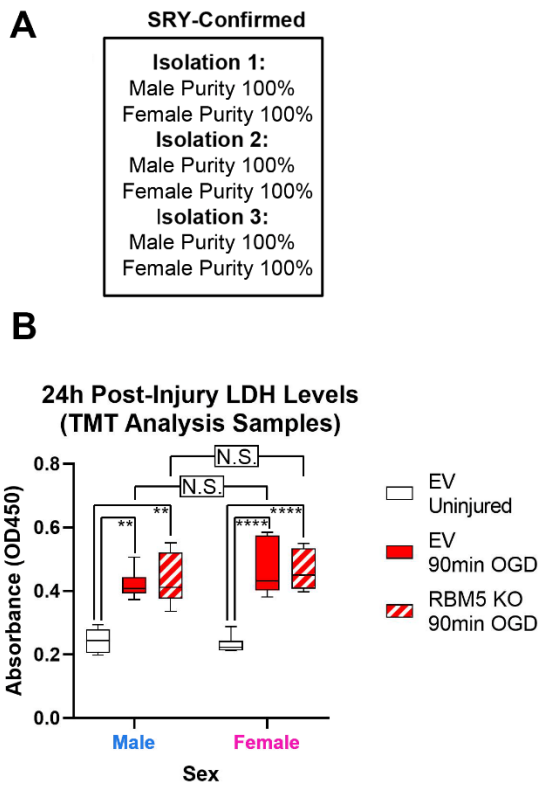

Fig. S14

## Uncropped Blots (Fig. 2)

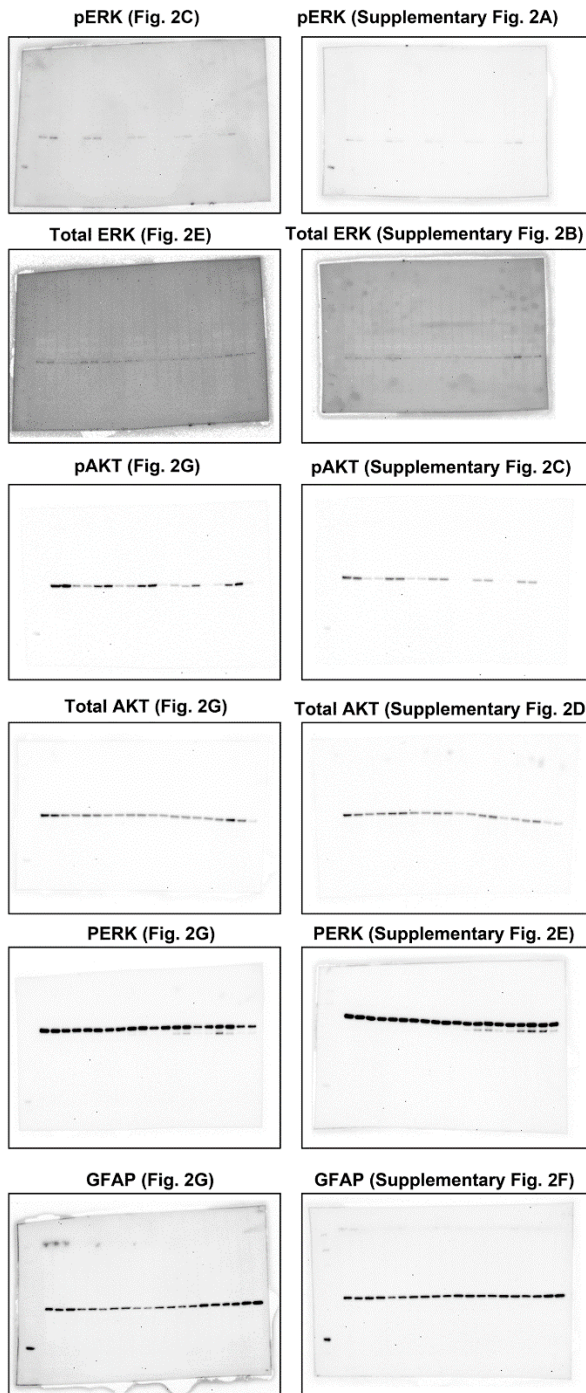

Fig. S15

Uncropped Blots (Fig. 4 and Fig. 5)

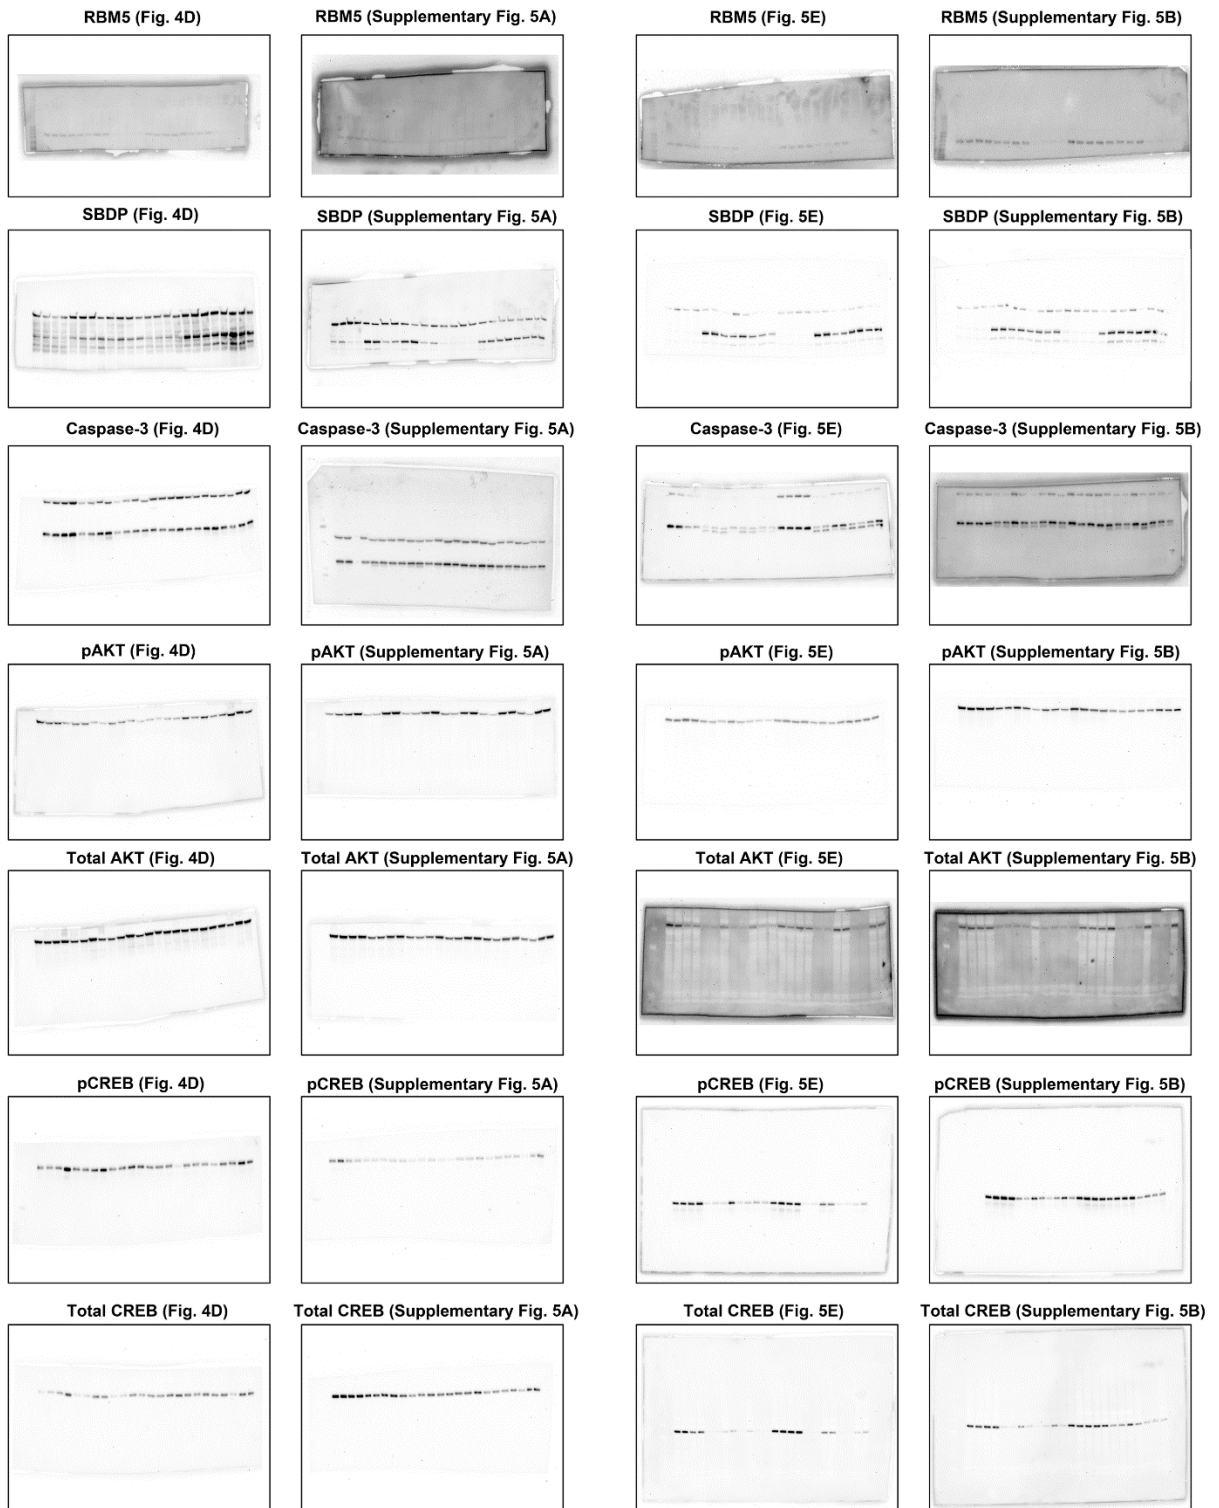

Fig. S16

**Uncropped Blots (Fig. 6)**

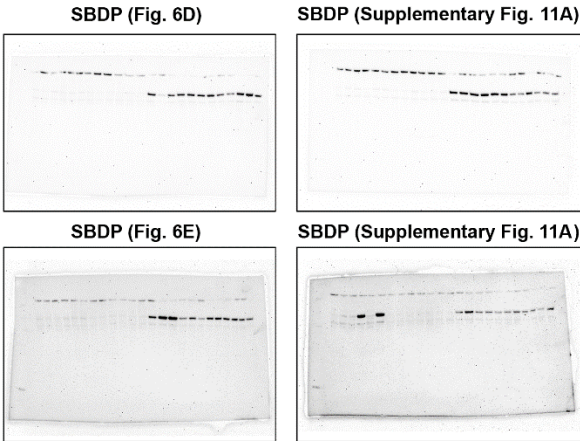

**Fig. S17**

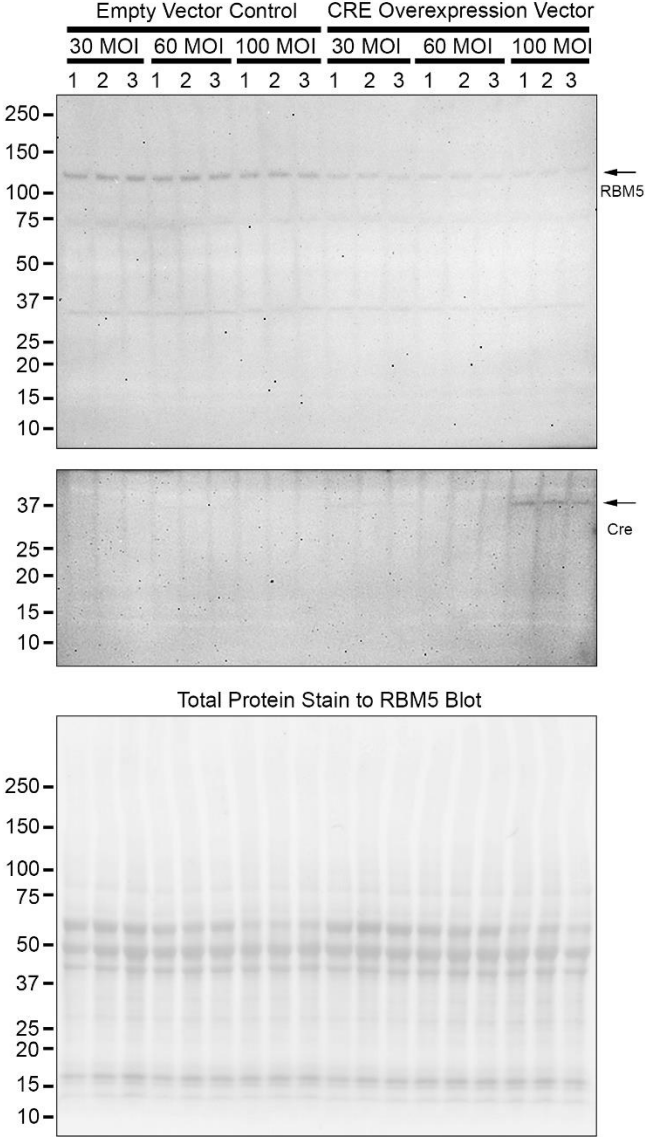

## Supplementary Tables 1-10

### Statistical Tests & Outcomes

**Table 1 Statistical Results: Matrigel Removal Protocol Protein Targets (2-WAY-ANOVA)**

| Figure Panel   | Target       | Passed Normality Test        | Gaussian Distribution | Aligned Rank Transformation Of Data (ARTool) | Factor 1: Matrigel Removal | Factor 2: Insult Severity | Interaction Term   |
|----------------|--------------|------------------------------|-----------------------|----------------------------------------------|----------------------------|---------------------------|--------------------|
| Fig. 2 Panel D | Phospho-ERK  | NO<br>( <b>p=0.0001</b> )    | NO                    | YES                                          | <b>p&lt;0.0001</b>         | <b>p=0.0002</b>           | <b>p&lt;0.0001</b> |
| Fig. 2 Panel F | Total ERK    | YES<br>(p=0.0510)            | YES                   | NO                                           | p=0.2162                   | <b>p=0.0002</b>           | p=0.6792           |
| Fig. 2 Panel H | Phospho-AKT  | YES<br>(p=0.1000)            | YES                   | NO                                           | <b>p&lt;0.0001</b>         | <b>p&lt;0.0001</b>        | <b>p&lt;0.0001</b> |
| Fig. 2 Panel I | Total AKT    | YES<br>(p=0.1000)            | YES                   | NO                                           | <b>p&lt;0.0001</b>         | <b>p=0.0143</b>           | p=0.2594           |
| Fig. 2 Panel J | Cleaved PERK | NO<br>( <b>p&lt;0.0001</b> ) | NO                    | YES                                          | <b>p&lt;0.0001</b>         | <b>p&lt;0.0001</b>        | <b>p=0.0014</b>    |
| Fig. 2 Panel K | Total GFAP   | NO<br>( <b>p=0.0475</b> )    | NO                    | YES                                          | <b>p=0.0018</b>            | <b>p=0.0019</b>           | p=0.3957           |

**Table 2 Statistical Results: Mechanical Stretch WT Neurons Peak Pressure, LDH, & Protein Targets (Unpaired t-test and 2-WAY-ANOVA)**

| Figure Panel   | Target                       | Passed Normality Test     | Gaussian Distribution | Aligned Rank Transformation Of Data (ARTool) | Factor 1: Injury   | Factor 2: Sex | Interaction Term |
|----------------|------------------------------|---------------------------|-----------------------|----------------------------------------------|--------------------|---------------|------------------|
| Fig. 3 Panel A | Well Peak Pressure (Injured) | NO<br>( <b>p=0.0013</b> ) | NO                    | YES                                          | p=0.2331           | N/A           | N/A              |
| Fig. 3 Panel C | LDH Levels                   | NO<br>( <b>p=0.0149</b> ) | NO                    | YES                                          | <b>p&lt;0.0001</b> | p=0.0924      | p=0.7451         |
| Fig. 3 Panel E | SBDP 145 Levels              | NO<br>( <b>p=0.0035</b> ) | NO                    | YES                                          | <b>p&lt;0.0007</b> | p=0.1265      | p=0.0804         |

**Table 3 Statistical Results: Mechanical Stretch Floxed Neurons Peak Pressure & LDH (3-WAY-ANOVA)**

| Figure Panel   | Target                                     | Passed Normality Test                           | Gaussian Distribution                        | Aligned Rank Transformation Of Data (ARTool)          | Factor 1: Injury   | Factor 2: Sex      | Factor 3 Genotype |
|----------------|--------------------------------------------|-------------------------------------------------|----------------------------------------------|-------------------------------------------------------|--------------------|--------------------|-------------------|
| Fig. 4 Panel A | Well Peak Pressure                         | NO<br>( <b>p&lt;0.0001</b> )                    | NO                                           | YES                                                   | <b>p&lt;0.0001</b> | <b>p&lt;0.0001</b> | p=0.0805          |
| Fig. 4 Panel C | LDH Levels                                 | YES<br>(p=0.1000)                               | YES                                          | NO                                                    | <b>p&lt;0.0001</b> | p=0.9112           | p=0.2148          |
| <i>Cont'd</i>  | <b>Interaction Term 1<br/>Injury x Sex</b> | <b>Interaction Term 2<br/>Injury x Genotype</b> | <b>Interaction Term 3<br/>Sex x Genotype</b> | <b>Interaction Term 4<br/>Genotype x Sex x Injury</b> |                    |                    |                   |
| Fig. 4 Panel A | <b>p&lt;0.0001</b>                         | p=0.0805                                        | <b>p=0.0080</b>                              | <b>p=0.0080</b>                                       |                    |                    |                   |
| Fig. 4 Panel C | p=0.9752                                   | p=0.1525                                        | p=0.4924                                     | p=0.4338                                              |                    |                    |                   |

**Table 4 Statistical Results: Mechanical Stretch Floxed Neurons Protein Targets (2-WAY-ANOVA)**

| Figure Panel   | Target          | Passed Normality Test | Gaussian Distribution | Aligned Rank Transformation Of Data (ARTool) | Factor 1: Vector/Injury | Factor 2: Sex | Interaction Term |
|----------------|-----------------|-----------------------|-----------------------|----------------------------------------------|-------------------------|---------------|------------------|
| Fig. 4 Panel E | RBM5 Levels     | YES (p=0.1000)        | YES                   | NO                                           | p<0.0001                | p=0.0004      | p<0.0195         |
| Fig. 4 Panel F | SBDP 145 Levels | NO (p=0.0128)         | NO                    | YES                                          | p<0.0001                | p=0.0019      | p=0.0015         |
| Fig. 4 Panel G | pAKT473 Levels  | NO (p=0.0072)         | NO                    | YES                                          | p=0.2503                | p=0.8461      | p=0.1482         |
| Fig. 4 Panel H | pCREB133 Levels | YES (p=0.1000)        | YES                   | NO                                           | p=0.2395                | p=0.5732      | p=0.0456         |

**Table 5 Statistical Results: OGD LDH WT Neurons (2-WAY-ANOVA)**

| Figure Panel   | Target     | Passed Normality Test | Gaussian Distribution | Aligned Rank Transformation Of Data (ARTool) | Factor 1: Injury | Factor 2: Sex | Interaction Term |
|----------------|------------|-----------------------|-----------------------|----------------------------------------------|------------------|---------------|------------------|
| Fig. 5 Panel A | LDH Levels | NO (p=0.0124)         | NO                    | YES                                          | p<0.0001         | p=0.1323      | p=0.0043         |

**Table 6 Statistical Results: OGD LDH RBM5 Floxed Neurons (3-WAY-ANOVA)**

| Figure Panel   | Target                          | Passed Normality Test                | Gaussian Distribution             | Aligned Rank Transformation Of Data (ARTool) | Factor 1: Injury | Factor 2: Sex | Factor 3 Genotype |
|----------------|---------------------------------|--------------------------------------|-----------------------------------|----------------------------------------------|------------------|---------------|-------------------|
| Fig. 5 Panel C | LDH Levels                      | YES (p=0.1000)                       | YES                               | NO                                           | p<0.0001         | p=0.0170      | p=0.6416          |
| <i>Cont'd</i>  | Interaction Term 1 Injury x Sex | Interaction Term 2 Injury x Genotype | Interaction Term 3 Sex x Genotype | Interaction Term 4 Genotype x Sex x Injury   |                  |               |                   |
| Fig. 5 Panel C | p=0.8277                        | p=0.1087                             | p=0.2146                          | p=0.8339                                     |                  |               |                   |

**Table 7 Statistical Results: OGD Protein Targets Floxed Neurons (2-WAY-ANOVA)**

| Figure Panel   | Target             | Passed Normality Test | Gaussian Distribution | Aligned Rank Transformation Of Data (ARTool) | Factor 1: Vector/Injury | Factor 2: Sex | Interaction Term |
|----------------|--------------------|-----------------------|-----------------------|----------------------------------------------|-------------------------|---------------|------------------|
| Fig. 5 Panel F | RBM5 Levels        | NO (p=0.0017)         | NO                    | YES                                          | p<0.0001                | p=0.6510      | p=0.0013         |
| Fig. 5 Panel G | SBDP 145 Levels    | NO (p=0.0015)         | NO                    | YES                                          | p<0.0001                | p=0.0004      | p=0.0018         |
| Fig. 5 Panel H | SBDP 120 Levels    | YES (p=0.1000)        | YES                   | NO                                           | p<0.0001                | p=0.0078      | p=0.3917         |
| Fig. 5 Panel I | Caspase 3 Fragment | NO (p=0.0209)         | NO                    | YES                                          | p<0.0001                | p=0.0135      | p=0.0072         |
| Fig. 5 Panel J | pAKT473 Levels     | YES (p=0.1000)        | YES                   | NO                                           | p<0.0001                | p=0.2200      | p<0.0001         |
| Fig. 5 Panel K | pCREB133 Levels    | YES (p=0.1000)        | YES                   | NO                                           | p<0.0001                | p=0.1194      | p=0.1803         |

**Table 8 Statistical Results: OGD Floxed Neurons & Estradiol Treatment LDH (3-WAY-ANOVA)**

| Figure Panel   | Target                                      | Passed Normality Test                           | Gaussian Distribution                         | Aligned Rank Transformation Of Data (ARTool)           | Factor 1: Injury   | Factor 2: Drug  | Factor 3 Genotype |
|----------------|---------------------------------------------|-------------------------------------------------|-----------------------------------------------|--------------------------------------------------------|--------------------|-----------------|-------------------|
| Fig. 6 Panel A | LDH Levels                                  | NO<br>( <b>p&lt;0.0209</b> )                    | NO                                            | YES                                                    | <b>p&lt;0.0001</b> | p=0.1700        | p=0.1990          |
| Fig. 6 Panel B | LDH Levels                                  | NO<br>( <b>p&lt;0.0440</b> )                    | NO                                            | YES                                                    | <b>p&lt;0.0001</b> | <b>p=0.0090</b> | p=0.1297          |
| <i>Cont'd</i>  | <b>Interaction Term 1<br/>Injury x Drug</b> | <b>Interaction Term 2<br/>Injury x Genotype</b> | <b>Interaction Term 3<br/>Drug x Genotype</b> | <b>Interaction Term 4<br/>Genotype x Drug x Injury</b> |                    |                 |                   |
| Fig. 6 Panel A | p=0.2480                                    | p=0.0568                                        | p=0.9849                                      | p=0.8944                                               |                    |                 |                   |
| Fig. 6 Panel B | <b>p=0.0033</b>                             | p=0.0842                                        | p=0.9534                                      | p=0.4760                                               |                    |                 |                   |

**Table 9 Statistical Results: OGD Floxed Neurons & Estradiol Treatment SBDP Targets (3-WAY-ANOVA)**

| Figure Panel   | Target                                      | Passed Normality Test                           | Gaussian Distribution                         | Aligned Rank Transformation Of Data (ARTool)           | Factor 1: Injury   | Factor 2: Drug  | Factor 3 Genotype |
|----------------|---------------------------------------------|-------------------------------------------------|-----------------------------------------------|--------------------------------------------------------|--------------------|-----------------|-------------------|
| Fig. 6 Panel F | SBDP Levels 145kDa                          | NO<br>( <b>p&lt;0.0001</b> )                    | NO                                            | YES                                                    | <b>p&lt;0.0001</b> | <b>p=0.0537</b> | <b>p=0.0025</b>   |
| Fig. 6 Panel G | SBDP Levels 145kDa                          | NO<br>( <b>p=0.0029</b> )                       | NO                                            | YES                                                    | <b>p&lt;0.0001</b> | p=0.4425        | p=0.5196          |
| Fig. 6 Panel H | SBDP Levels 120kDa                          | YES<br>(p=0.1000)                               | YES                                           | NO                                                     | <b>p&lt;0.0001</b> | p=0.0669        | p=0.9995          |
| Fig. 6 Panel I | SBDP Levels 120kDa                          | YES<br>(p=0.1000)                               | YES                                           | NO                                                     | p=0.3085           | p=0.6086        | p=0.1120          |
| <i>Cont'd</i>  | <b>Interaction Term 1<br/>Injury x Drug</b> | <b>Interaction Term 2<br/>Injury x Genotype</b> | <b>Interaction Term 3<br/>Drug x Genotype</b> | <b>Interaction Term 4<br/>Genotype x Drug x Injury</b> |                    |                 |                   |
| Fig. 6 Panel F | p=0.0593                                    | <b>p=0.0029</b>                                 | p=0.1900                                      | p=0.1257                                               |                    |                 |                   |
| Fig. 6 Panel G | p=0.0225                                    | p=0.1762                                        | p=0.2485                                      | p=0.0190                                               |                    |                 |                   |
| Fig. 6 Panel H | p=0.2414                                    | p=0.6696                                        | p=0.3096                                      | p=0.2025                                               |                    |                 |                   |
| Fig. 6 Panel I | p=0.3705                                    | <b>p=0.0314</b>                                 | <b>p=0.0372</b>                               | <b>p=0.0019</b>                                        |                    |                 |                   |

**Table 10 Statistical Results: OGD Floxed Neurons LDH for TMT Study (2-WAY-ANOVA)**

| Figure Panel         | Target     | Passed Normality Test | Gaussian Distribution | Aligned Rank Transformation Of Data (ARTool) | Factor 1: Vector/Injury | Factor 2: Sex | Interaction Term |
|----------------------|------------|-----------------------|-----------------------|----------------------------------------------|-------------------------|---------------|------------------|
| Supplementary Figure | LDH Levels | NO<br>(p=0.0055)      | NO                    | YES                                          | <b>p&lt;0.0001</b>      | p=0.2547      | p=0.4646         |



**Supplementary Table 11**

| Embryo Number | Sex Determination Made Visually | Actual Sex (SRY Genotyping) | Incorrect Assignment (X) | Embryo Culture Isolation Date |
|---------------|---------------------------------|-----------------------------|--------------------------|-------------------------------|
| 1             | Female                          | Female                      |                          | 4.2.21                        |
| 2             | Female                          | Female                      |                          |                               |
| 3             | Male                            | Male                        |                          |                               |
| 4             | Female                          | Female                      |                          |                               |
| 5             | Male                            | Male                        |                          |                               |
| 6             | Female                          | Female                      |                          |                               |
| 7             | Male                            | Male                        |                          |                               |
| 8             | Male                            | Male                        |                          |                               |
| 9             | Male                            | Male                        |                          |                               |
| 10            | Male                            | Male                        |                          |                               |
| 11            | Female                          | Female                      |                          |                               |
| 12            | Male                            | Female                      | X                        |                               |
| 13            | Male                            | Male                        |                          |                               |
| 14            | Male                            | Male                        |                          |                               |
| 15            | Male                            | Male                        |                          |                               |
| 16            | Male                            | Male                        |                          |                               |
| 17            | Female                          | Female                      |                          |                               |
| 18            | Female                          | Female                      |                          |                               |
| 19            | Female                          | Female                      |                          |                               |
| 20            | Female                          | Female                      |                          |                               |
| 21            | Female                          | Female                      |                          |                               |
| 22            | Male                            | Male                        |                          |                               |
| 23            | Male                            | Male                        |                          |                               |
| 24            | Male                            | Male                        |                          |                               |
| 25            | Male                            | Male                        |                          | 4.30.21                       |
| 26            | Female                          | Male                        | X                        | Out of Protocol               |
| 27            | Male                            | Male                        |                          | (Below 80%)                   |
| 28            | Male                            | Male                        |                          |                               |
| 29            | Female                          | Female                      |                          |                               |
| 30            | Male                            | Male                        |                          |                               |
| 31            | Male                            | Male                        |                          |                               |
| 32            | Male                            | Male                        |                          |                               |
| 33            | Male                            | Male                        |                          |                               |
| 34            | Male                            | Female                      | X                        |                               |
| 35            | Male                            | Female                      | X                        |                               |
| 36            | Female                          | Female                      |                          |                               |
| 37            | Male                            | Female                      | X                        |                               |
| 38            | Female                          | Female                      |                          |                               |
| 39            | Female                          | Female                      |                          |                               |
| 40            | Male                            | Male                        |                          |                               |
| 41            | Female                          | Female                      |                          | 5.3.21                        |
| 42            | Female                          | Male                        | X                        |                               |

|    |        |        |   |         |
|----|--------|--------|---|---------|
| 43 | Male   | Male   |   |         |
| 44 | Female | Female |   |         |
| 45 | Male   | Male   |   |         |
| 46 | Male   | Male   |   |         |
| 47 | Female | Female |   |         |
| 48 | Female | Female |   |         |
| 49 | Female | Female |   |         |
| 50 | Female | Female |   |         |
| 51 | Female | Female |   |         |
| 52 | Male   | Male   |   |         |
| 53 | Female | Female |   |         |
| 54 | Male   | Male   |   |         |
| 55 | Female | Female |   |         |
| 56 | Male   | Male   |   | 5.7.21  |
| 57 | Male   | Male   |   |         |
| 58 | Male   | Male   |   |         |
| 59 | Male   | Male   |   |         |
| 60 | Female | Female |   |         |
| 61 | Female | Female |   |         |
| 62 | Female | Male   | X |         |
| 63 | Male   | Male   |   |         |
| 64 | Female | Female |   |         |
| 65 | Male   | Male   |   |         |
| 66 | Female | Female |   |         |
| 67 | Female | Male   | X | 5.21.21 |
| 68 | Male   | Male   |   |         |
| 69 | Male   | Male   |   |         |
| 70 | Female | Female |   |         |
| 71 | Female | Female |   |         |
| 72 | Male   | Male   |   |         |
| 73 | Male   | Male   |   |         |
| 74 | Male   | Male   |   |         |
| 75 | Female | Female |   |         |
| 76 | Female | Female |   |         |
| 77 | Male   | Male   |   |         |
| 78 | Female | Female |   |         |
| 79 | Female | Female |   |         |
| 80 | Male   | Male   |   |         |
| 81 | Female | Female |   |         |
| 82 | Male   | Male   |   |         |
| 83 | Female | Female |   |         |
| 84 | Female | Female |   |         |
| 85 | Male   | Male   |   |         |
| 86 | Male   | Male   |   |         |
| 87 | Male   | Male   |   |         |
| 88 | Female | Female |   | 4.21.22 |

|     |        |        |   |         |
|-----|--------|--------|---|---------|
| 89  | Female | Female |   |         |
| 90  | Male   | Female | X |         |
| 91  | Male   | Male   |   |         |
| 92  | Male   | Male   |   |         |
| 93  | Female | Female |   |         |
| 94  | Male   | Male   |   |         |
| 95  | Male   | Male   |   |         |
| 96  | Female | Female |   |         |
| 97  | Male   | Male   |   |         |
| 98  | Female | Female |   |         |
| 99  | Female | Male   | X |         |
| 100 | Male   | Male   |   | 5.12.22 |
| 101 | Female | Female |   |         |
| 102 | Female | Female |   |         |
| 103 | Male   | Male   |   |         |
| 104 | Female | Female |   |         |
| 105 | Male   | Male   |   |         |
| 106 | Male   | Male   |   |         |
| 107 | Male   | Male   |   |         |
| 108 | Male   | Male   |   |         |
| 109 | Male   | Male   |   |         |
| 110 | Female | Female |   |         |
| 111 | Male   | Male   |   |         |
| 112 | Male   | Male   |   |         |
| 113 | Male   | Male   |   |         |
| 114 | Female | Female |   |         |
| 115 | Male   | Male   |   |         |
| 116 | Female | Female |   |         |
| 117 | Female | Female |   | 6.13.22 |
| 118 | Female | Female |   |         |
| 119 | Male   | Male   |   |         |
| 120 | Male   | Male   |   |         |
| 121 | Male   | Male   |   |         |
| 122 | Male   | Male   |   |         |
| 123 | Female | Female |   |         |
| 124 | Male   | Male   |   |         |
| 125 | Male   | Male   |   |         |
| 126 | Female | Female |   |         |
| 127 | Female | Female |   |         |
| 128 | Female | Female |   |         |
| 129 | Male   | Female | X | 6.17.22 |
| 130 | Male   | Male   |   |         |
| 131 | Male   | Male   |   |         |
| 132 | Female | Female |   |         |
| 133 | Female | Female |   |         |
| 134 | Female | Female |   |         |

|     |        |        |  |         |
|-----|--------|--------|--|---------|
| 135 | Female | Female |  |         |
| 136 | Female | Female |  |         |
| 137 | Female | Female |  |         |
| 138 | Male   | Male   |  |         |
| 139 | Female | Female |  |         |
| 140 | Female | Female |  |         |
| 141 | Male   | Male   |  |         |
| 142 | Female | Female |  |         |
| 143 | Female | Female |  |         |
| 144 | Male   | Male   |  |         |
| 145 | Male   | Male   |  |         |
| 146 | Male   | Male   |  | 7.5.22  |
| 147 | Female | Female |  |         |
| 148 | Female | Female |  |         |
| 149 | Female | Female |  |         |
| 150 | Male   | Male   |  |         |
| 151 | Male   | Male   |  |         |
| 152 | Female | Female |  |         |
| 153 | Female | Female |  |         |
| 154 | Male   | Male   |  |         |
| 155 | Male   | Male   |  |         |
| 156 | Male   | Male   |  |         |
| 157 | Female | Female |  |         |
| 158 | Female | Female |  |         |
| 159 | Male   | Male   |  |         |
| 160 | Male   | Male   |  |         |
| 161 | Female | Female |  |         |
| 162 | Female | Female |  |         |
| 163 | Male   | Male   |  |         |
| 164 | Female | Female |  |         |
| 165 | Male   | Male   |  |         |
| 166 | Female | Female |  |         |
| 167 | Female | Female |  |         |
| 167 | Male   | Male   |  |         |
| 168 | Male   | Male   |  | 7.8.22  |
| 169 | Female | Female |  |         |
| 170 | Male   | Male   |  |         |
| 171 | Female | Female |  |         |
| 172 | Female | Female |  |         |
| 173 | Female | Female |  |         |
| 174 | Male   | Male   |  |         |
| 175 | Male   | Male   |  | 7.11.22 |
| 176 | Male   | Male   |  |         |
| 177 | Male   | Male   |  |         |
| 178 | Male   | Male   |  |         |
| 179 | Male   | Male   |  |         |

|     |        |        |   |         |
|-----|--------|--------|---|---------|
| 180 | Female | Female |   |         |
| 181 | Male   | Male   |   |         |
| 182 | Male   | Male   |   |         |
| 183 | Female | Female |   |         |
| 184 | Female | Female |   |         |
| 185 | Male   | Male   |   |         |
| 186 | Female | Female |   |         |
| 187 | Female | Female |   |         |
| 188 | Male   | Male   |   |         |
| 189 | Male   | Male   |   |         |
| 190 | Female | Female |   |         |
| 191 | Male   | Male   |   |         |
| 192 | Female | Female |   |         |
| 193 | Male   | Male   |   |         |
| 194 | Male   | Male   |   |         |
| 195 | Male   | Male   |   |         |
| 196 | Female | Female |   |         |
| 197 | Male   | Male   |   |         |
| 198 | Female | Female |   |         |
| 199 | Male   | Male   |   |         |
| 200 | Female | Female |   |         |
| 201 | Female | Female |   |         |
| 202 | Female | Female |   |         |
| 203 | Female | Female |   | 8.30.22 |
| 204 | Female | Female |   |         |
| 205 | Female | Female |   |         |
| 206 | Female | Female |   |         |
| 207 | Male   | Male   |   |         |
| 208 | Female | Male   | X |         |
| 209 | Female | Female |   |         |
| 210 | Female | Female |   |         |
| 211 | Female | Female |   |         |
| 212 | Male   | Male   |   |         |
| 213 | Male   | Male   |   |         |
| 214 | Female | Female |   |         |
| 215 | Male   | Male   |   |         |
| 216 | Female | Female |   |         |
| 217 | Male   | Male   |   |         |
| 218 | Male   | Male   |   |         |
| 219 | Male   | Male   |   |         |
| 220 | Male   | Male   |   |         |
| 221 | Male   | Male   |   |         |
| 222 | Female | Female |   |         |
| 223 | Male   | Male   |   |         |
| 224 | Male   | Male   |   |         |
| 225 | Female | Female |   |         |

|     |        |        |  |          |
|-----|--------|--------|--|----------|
| 225 | Female | Female |  |          |
| 226 | Female | Female |  |          |
| 227 | Female | Female |  |          |
| 228 | Female | Female |  |          |
| 229 | Female | Female |  |          |
| 230 | Female | Female |  |          |
| 231 | Female | Female |  |          |
| 232 | Female | Female |  |          |
| 233 | Female | Female |  | 9.12.22  |
| 234 | Male   | Male   |  |          |
| 235 | Male   | Male   |  |          |
| 236 | Female | Female |  |          |
| 237 | Male   | Male   |  |          |
| 238 | Male   | Male   |  |          |
| 239 | Male   | Male   |  |          |
| 240 | Female | Female |  |          |
| 241 | Female | Female |  |          |
| 242 | Male   | Male   |  |          |
| 243 | Male   | Male   |  |          |
| 244 | Female | Female |  |          |
| 245 | Male   | Male   |  |          |
| 246 | Female | Female |  |          |
| 247 | Female | Female |  |          |
| 248 | Male   | Male   |  |          |
| 249 | Female | Female |  |          |
| 250 | Male   | Male   |  |          |
| 251 | Male   | Male   |  |          |
| 252 | Male   | Male   |  |          |
| 253 | Female | Female |  |          |
| 254 | Male   | Male   |  | 10.10.22 |
| 255 | Male   | Male   |  |          |
| 256 | Female | Female |  |          |
| 257 | Female | Female |  |          |
| 258 | Male   | Male   |  |          |
| 259 | Male   | Male   |  |          |
| 260 | Male   | Male   |  |          |
| 261 | Female | Female |  |          |
| 262 | Female | Female |  |          |
| 263 | Female | Female |  |          |
| 264 | Male   | Male   |  |          |
| 265 | Female | Female |  |          |
| 266 | Female | Female |  |          |
| 267 | Male   | Male   |  |          |
| 268 | Male   | Male   |  | 10.13.22 |
| 269 | Female | Female |  |          |
| 270 | Female | Female |  |          |

|     |        |        |  |          |
|-----|--------|--------|--|----------|
| 271 | Male   | Male   |  |          |
| 272 | Male   | Male   |  |          |
| 273 | Female | Female |  |          |
| 274 | Male   | Male   |  |          |
| 275 | Female | Female |  |          |
| 276 | Male   | Male   |  |          |
| 277 | Male   | Male   |  |          |
| 278 | Female | Female |  |          |
| 279 | Female | Female |  |          |
| 280 | Female | Female |  |          |
| 281 | Male   | Male   |  |          |
| 282 | Male   | Male   |  |          |
| 283 | Male   | Male   |  |          |
| 284 | Female | Female |  |          |
| 285 | Female | Female |  |          |
| 286 | Female | Female |  |          |
| 287 | Female | Female |  |          |
| 288 | Male   | Male   |  |          |
| 289 | Female | Female |  |          |
| 290 | Male   | Male   |  |          |
| 291 | Female | Female |  |          |
| 292 | Female | Female |  |          |
| 293 | Male   | Male   |  |          |
| 294 | Male   | Male   |  |          |
| 295 | Male   | Male   |  |          |
| 296 | Male   | Male   |  |          |
| 297 | Male   | Male   |  |          |
| 298 | Male   | Male   |  |          |
| 299 | Male   | Male   |  |          |
| 300 | Male   | Male   |  |          |
| 301 | Female | Female |  |          |
| 302 | Male   | Male   |  |          |
| 303 | Female | Female |  |          |
| 304 | Male   | Male   |  | 10.26.22 |
| 305 | Female | Female |  |          |
| 306 | Male   | Male   |  |          |
| 307 | Female | Female |  |          |
| 308 | Female | Female |  |          |
| 309 | Male   | Male   |  |          |
| 310 | Male   | Male   |  |          |
| 311 | Male   | Male   |  |          |
| 312 | Male   | Male   |  |          |
| 313 | Male   | Male   |  |          |
| 314 | Female | Female |  |          |
| 315 | Male   | Male   |  |          |
| 316 | Male   | Male   |  |          |

|     |        |        |  |          |
|-----|--------|--------|--|----------|
| 317 | Male   | Male   |  |          |
| 318 | Male   | Male   |  |          |
| 319 | Female | Female |  |          |
| 320 | Male   | Male   |  |          |
| 321 | Female | Female |  |          |
| 322 | Male   | Male   |  |          |
| 323 | Female | Female |  |          |
| 324 | Female | Female |  |          |
| 325 | Female | Female |  | 11.15.22 |
| 326 | Female | Female |  |          |
| 327 | Male   | Male   |  |          |
| 328 | Female | Female |  |          |
| 329 | Male   | Male   |  |          |
| 330 | Male   | Male   |  |          |
| 331 | Male   | Male   |  |          |
| 332 | Male   | Male   |  |          |
| 333 | Female | Female |  |          |
| 334 | Female | Female |  |          |
| 335 | Male   | Male   |  |          |
| 336 | Male   | Male   |  |          |
| 337 | Male   | Male   |  |          |
| 338 | Male   | Male   |  |          |
| 339 | Female | Female |  |          |
| 340 | Female | Female |  |          |
| 341 | Female | Female |  |          |
| 342 | Male   | Male   |  |          |
| 343 | Female | Female |  |          |
| 344 | Male   | Male   |  |          |
| 345 | Male   | Male   |  |          |
| 346 | Male   | Male   |  | 11.21.22 |
| 347 | Female | Female |  |          |
| 348 | Female | Female |  |          |
| 349 | Male   | Male   |  |          |
| 350 | Male   | Male   |  |          |
| 351 | Male   | Male   |  |          |
| 352 | Male   | Male   |  |          |
| 353 | Male   | Male   |  |          |
| 354 | Male   | Male   |  |          |
| 355 | Female | Female |  |          |
| 356 | Male   | Male   |  |          |
| 357 | Female | Female |  |          |
| 358 | Male   | Male   |  |          |
| 359 | Female | Female |  |          |
| 360 | Male   | Male   |  |          |
| 361 | Male   | Male   |  |          |
| 362 | Female | Female |  |          |



|     |        |        |  |          |
|-----|--------|--------|--|----------|
| 363 | Male   | Male   |  |          |
| 364 | Male   | Male   |  |          |
| 365 | Female | Female |  |          |
| 366 | Female | Female |  |          |
| 367 | Female | Female |  |          |
| 368 | Female | Female |  |          |
| 369 | Female | Female |  | 11.28.22 |
| 370 | Female | Female |  |          |
| 371 | Male   | Male   |  |          |
| 372 | Female | Female |  |          |
| 373 | Female | Female |  |          |
| 374 | Male   | Male   |  |          |
| 375 | Male   | Male   |  |          |
| 376 | Female | Female |  |          |
| 377 | Male   | Male   |  |          |
| 378 | Male   | Male   |  |          |
| 379 | Male   | Male   |  |          |
| 380 | Male   | Male   |  |          |
| 381 | Male   | Male   |  |          |
| 382 | Female | Female |  |          |
| 383 | Female | Female |  |          |
| 384 | Female | Female |  |          |
| 385 | Male   | Male   |  |          |
| 386 | Male   | Male   |  |          |
| 387 | Female | Female |  |          |
| 388 | Male   | Male   |  |          |
| 389 | Male   | Male   |  |          |
| 390 | Female | Female |  |          |
| 391 | Male   | Male   |  |          |
| 392 | Male   | Male   |  |          |
| 393 | Female | Female |  |          |
| 394 | Male   | Male   |  |          |
| 395 | Female | Female |  |          |
| 396 | Female | Female |  |          |
| 397 | Male   | Male   |  |          |
| 398 | Male   |        |  | 12.7.22  |
| 399 | Female |        |  |          |
| 400 | Female |        |  |          |
| 401 | Female |        |  |          |
| 402 | Male   |        |  |          |
| 403 | Male   |        |  |          |
| 404 | Male   |        |  |          |
| 405 | Female |        |  |          |
| 406 | Female |        |  |          |
| 407 | Female |        |  |          |
| 408 | Male   |        |  |          |

|     |        |  |  |                   |
|-----|--------|--|--|-------------------|
| 409 | Male   |  |  |                   |
| 410 | Male   |  |  |                   |
| 411 | Male   |  |  |                   |
| 412 | Male   |  |  |                   |
| 413 | Male   |  |  |                   |
| 414 | Male   |  |  |                   |
| 415 | Male   |  |  |                   |
| 416 | Female |  |  |                   |
| 417 | Female |  |  | 3.14.23           |
| 418 | Female |  |  | Male Dishes Lost  |
| 419 | Female |  |  | (Technical Issue) |
| 420 | Female |  |  |                   |
| 421 | Female |  |  |                   |
| 422 | Female |  |  |                   |
| 423 | Female |  |  |                   |
| 424 | Female |  |  |                   |
| 425 | Female |  |  |                   |
| 426 | Female |  |  |                   |
| 427 | Female |  |  | 3.21.23           |
| 428 | Female |  |  |                   |
| 429 | Male   |  |  |                   |
| 430 | Female |  |  |                   |
| 431 | Female |  |  |                   |
| 432 | Female |  |  |                   |
| 433 | Female |  |  |                   |
| 434 | Male   |  |  |                   |
| 435 | Male   |  |  |                   |
| 436 | Male   |  |  |                   |
| 437 | Male   |  |  |                   |
| 438 | Male   |  |  |                   |
| 439 | Female |  |  |                   |
| 440 | Female |  |  |                   |
| 441 | Male   |  |  |                   |
| 442 | Male   |  |  |                   |
| 443 | Female |  |  |                   |
| 444 | Female |  |  |                   |
| 445 | Male   |  |  |                   |
| 446 | Male   |  |  |                   |
| 447 | Male   |  |  |                   |
| 448 | Female |  |  |                   |
| 449 | Male   |  |  |                   |
| 450 | Male   |  |  |                   |
| 451 | Female |  |  |                   |
| 452 | Female |  |  |                   |
| 453 | Male   |  |  |                   |
| 454 | Male   |  |  |                   |

|     |        |  |  |  |
|-----|--------|--|--|--|
| 456 | Male   |  |  |  |
| 457 | Female |  |  |  |
| 458 | Female |  |  |  |
| 459 | Male   |  |  |  |
| 460 | Female |  |  |  |
| 461 | Female |  |  |  |
| 462 | Male   |  |  |  |
| 463 | Female |  |  |  |
| 464 | Male   |  |  |  |
| 465 | Female |  |  |  |
| 466 | Female |  |  |  |
| 467 | Male   |  |  |  |

**12 Embryos Incorrectly Assigned out of 467 Total Embryos = 97.4% Success Rate to Appropriately Assign Sex**
